# Supplementary material for: Modulation of motor behavior by the mesencephalic locomotor region
Source: PubMed Central journal article supplement — Cell Rep. Author manuscript; Available in PMC 2021 Dec 3. (PMC8641693; doi:10.1016/j.celrep.2021.109594), 2021-08-24
Supplement: NIHMS1735651-supplement-1.pdf [file NIHMS1735651-supplement-1.pdf]

**Cell Reports, Volume 36**

**Supplemental information**

**Modulation of motor behavior by the mesencephalic  
locomotor region**

**Daniel Dautan, Adrienn Kovács, Tsogbadrakh Bayasgalan, Miguel A. Diaz-Acevedo, Balazs Pal, and Juan Mena-Segovia**

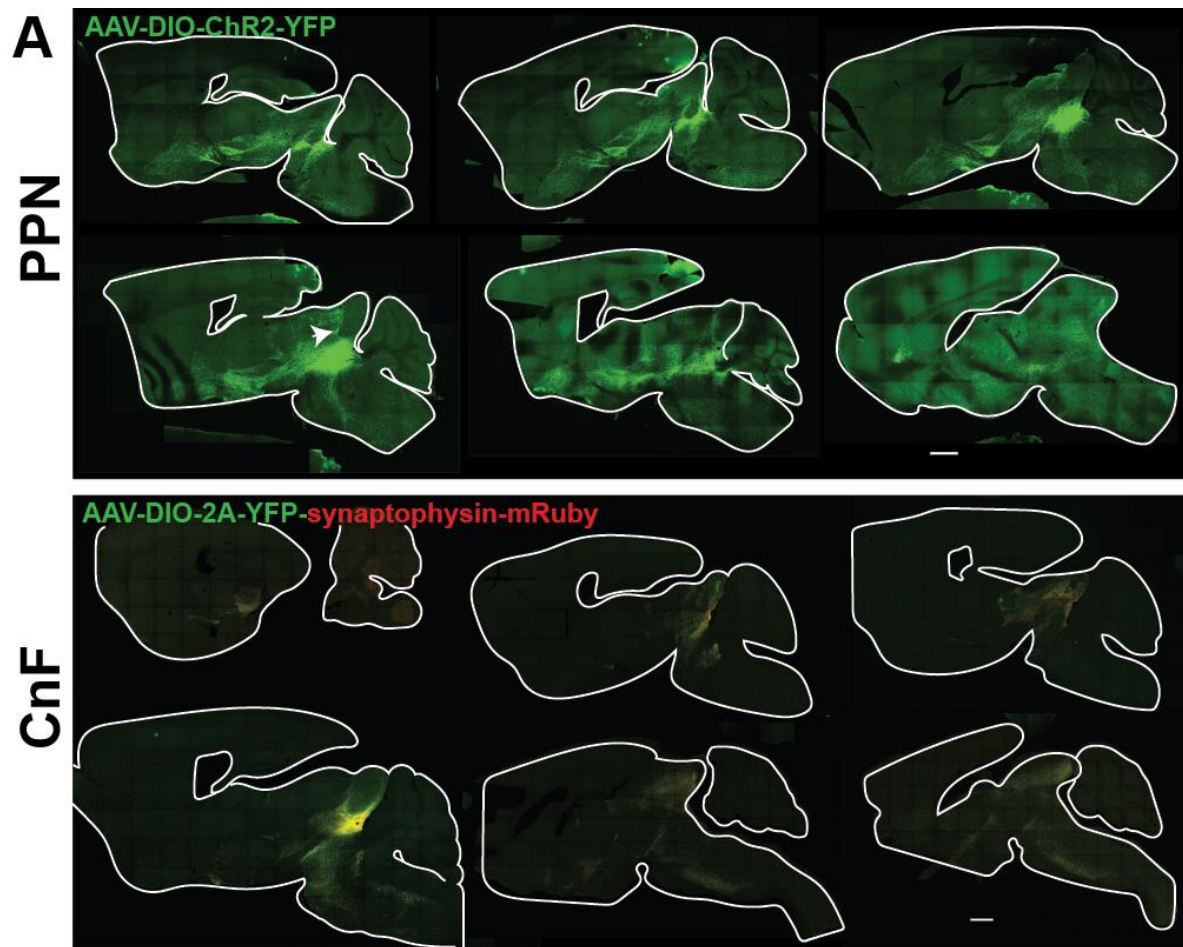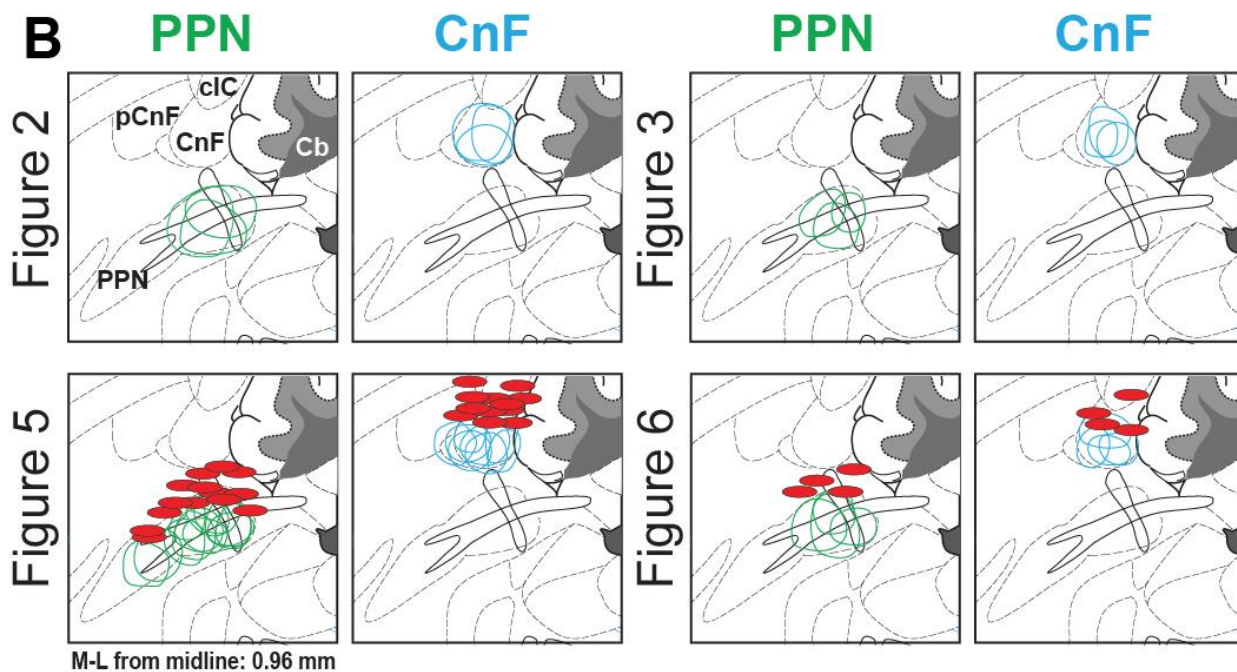

**Supplementary Figure 1. Whole-brain images of MLR glutamatergic projections and histological analysis. Related to Figures 1, 2, 3, 5 and 6.**

**A**, Fluorescent micrographs of PPN (top) and CnF (bottom) glutamatergic projections in the entire brain (6 representative sagittal sections) following transduction of VGLUT2-Cre mice. **B**, Virus spread (circles) and locations of the tip of the optic fibers (red circle) for PPN (green) and CnF (blue) groups. Data of transduction are represented as the maximum projection of the virus diffusion in the sagittal plane to allow better comparison. Scale bar: 1 mm.

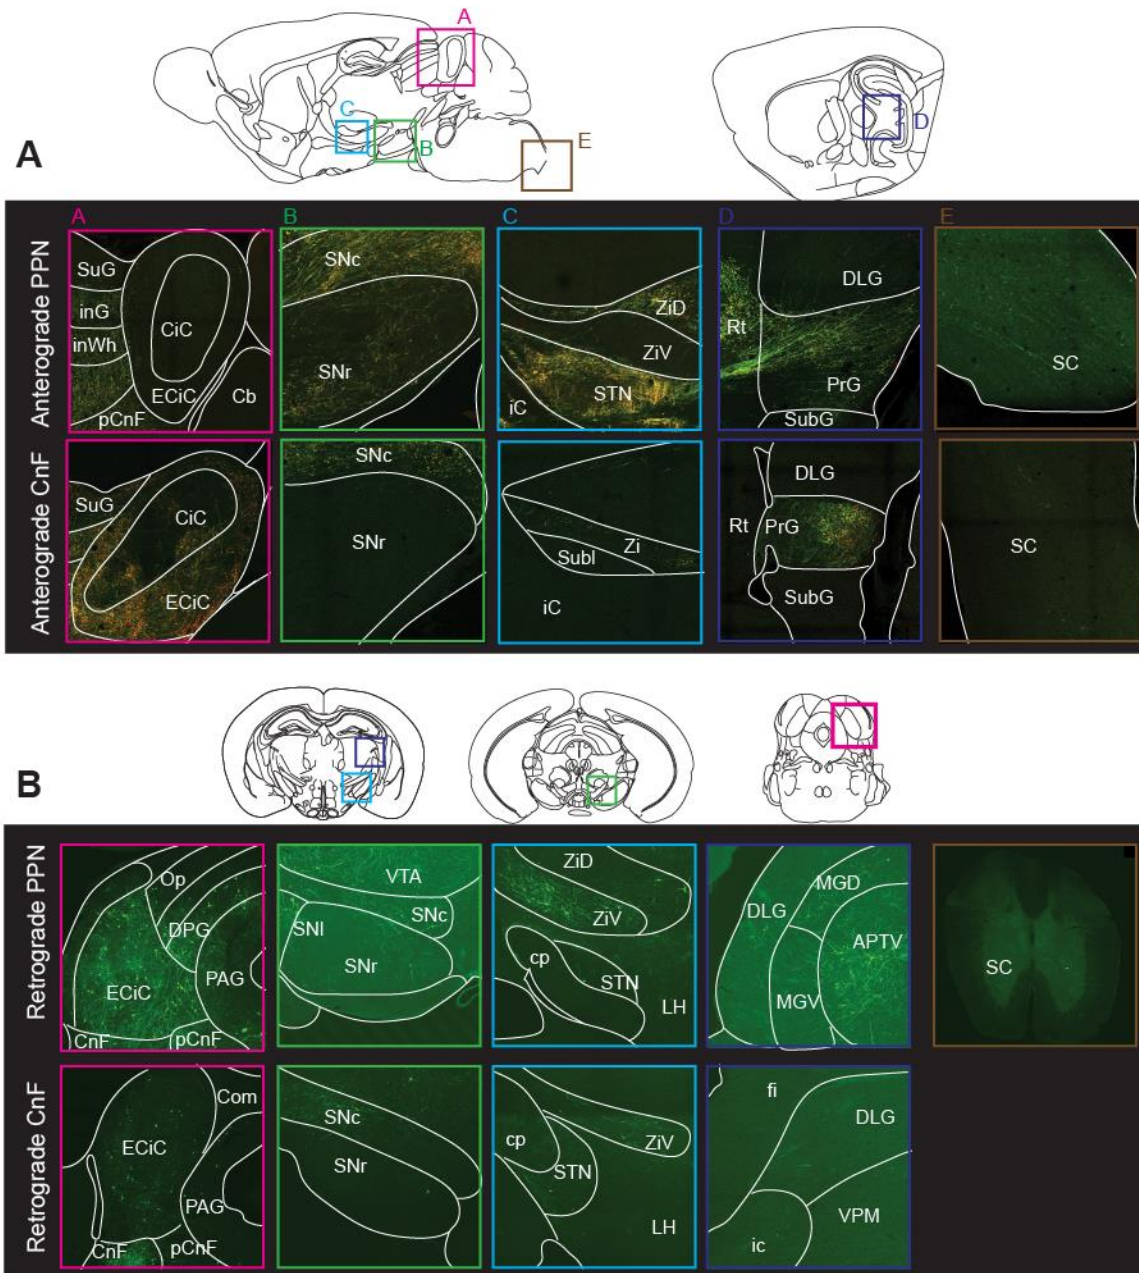

**Supplementary Figure 2. Comparative examples of labeling of PPN and CnF afferents and efferents. Related to Figures 2 and 3.**

Top, Representative examples of anterograde labeling following transduction of glutamatergic neurons in the PPN and CnF shown in the sagittal plane. Bottom, Representative examples of labeling of input neurons to the PPN and CnF glutamatergic neurons shown in the coronal plane. A, colliculus; B, SNr; C, STN and zona incerta; D, geniculate nucleus; E, spinal cord.





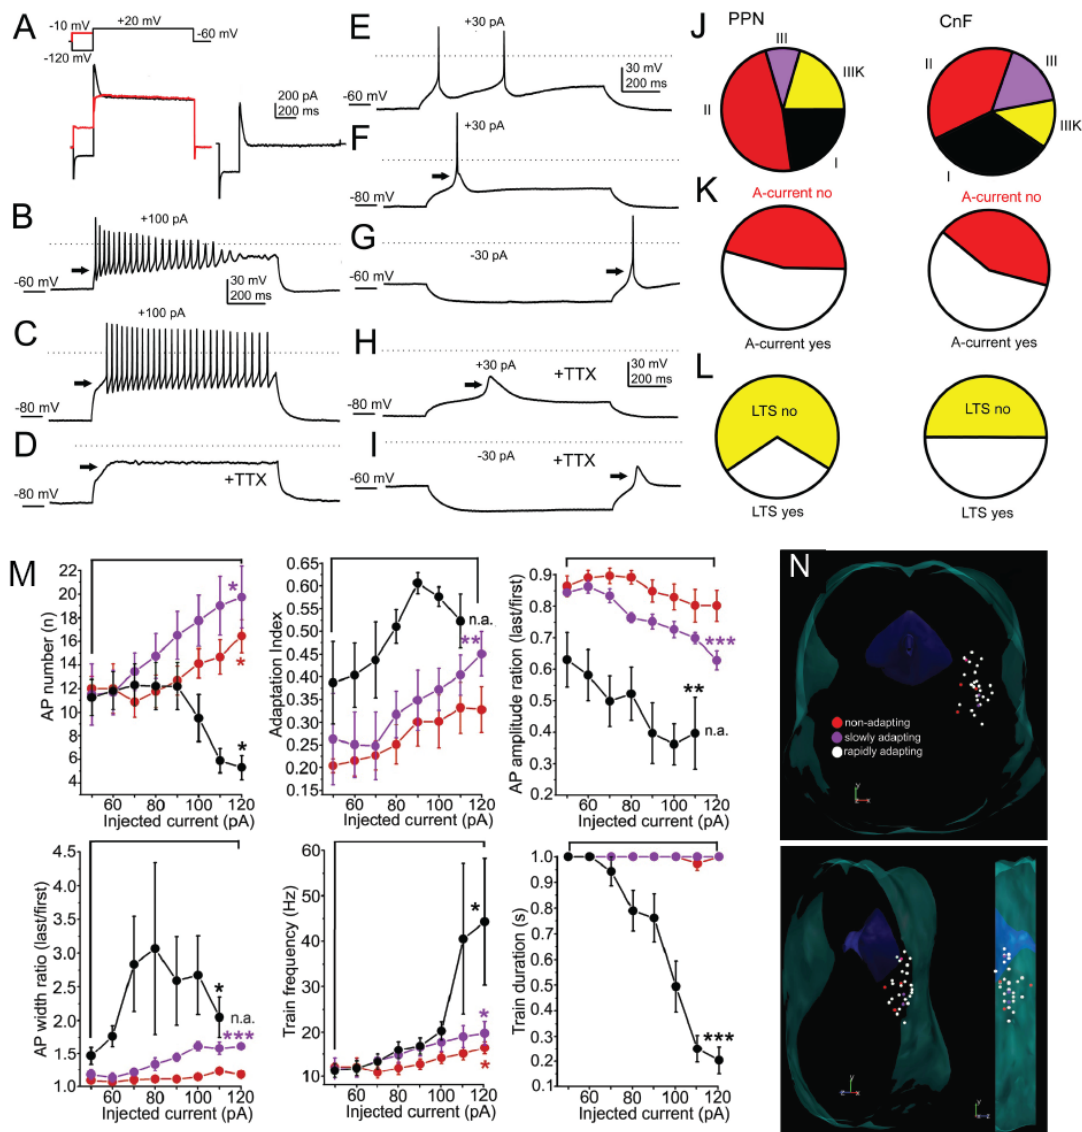

**Supplementary Figure 4. Physiological properties of the PPN and CnF glutamatergic neurons and their spatial distribution. Related to Figure 4.**

**A**, A-current was observed on most PPN and CnF glutamatergic neurons. Current traces elicited by +20 mV voltage step, preceded by -120 mV (black) and -10 mV (red) voltage steps (example shows PPN). The left current trace is the difference of the black and red current traces. **B-D**, Representative examples of the firing properties of PPN glutamatergic neurons. Trains of action potentials elicited by 100 pA depolarizing current injection from -59 mV (**B**), -87 mV (**C**) and -73 mV resting membrane potential (**D**, in the presence of TTX; the arrow indicates the lack of delay). **E-I**, Depolarization and action potential firing elicited by 30 pA depolarizing square current injection from -66 mV (**E**) and -83 mV (**F**) resting membrane potentials. Note the low threshold depolarizing spike (black arrow). (**G**) 30 pA hyperpolarizing current injection from -53 mV resting membrane potential revealed rebound spike and firing (black arrow). **H-I**, Low threshold spike and rebound depolarizing spike (respectively; arrow) in the presence of TTX. **J**, Distributions of functional neuronal types in the PPN and CnF. Group I neurons display low threshold depolarizing spikes but lack A-current (PPN: 22.7%, CnF 33.3%). Group II neurons display A-current (PPN: 47.7%, CnF 37.5%). Group III neurons display both (PPN: 9.1%, CnF 16.6%). Group IIIK lacks all (PPN: 20.5%, CnF 12.5%). **K**, Proportion of PPN and CnF neurons displaying A-current. **L**, Proportion of PPN and CnF neurons displaying low threshold spikes (LTS). **M**, Statistical summary of the number of action potentials elicited by 1-s depolarizing step, the adaptation index, the ratio of the amplitude of the last and first action potentials of the train, the ratio of the width of the last and first action potentials of the train, the frequency and the duration of the train in different functional subgroups (non-adapting, red; slowly adapting, purple; rapidly adapting, black). The significance was calculated between the first and last datapoints within each trace. \*  $P < 0.05$ , \*\*  $P < 0.01$ , \*\*\*  $P < 0.001$ . **N**, Location of recorded neurons in a three-dimensional view in the coronal plane. All experiments have been replicated in at least 3 mice. All data are represented as mean  $\pm$  SEM.

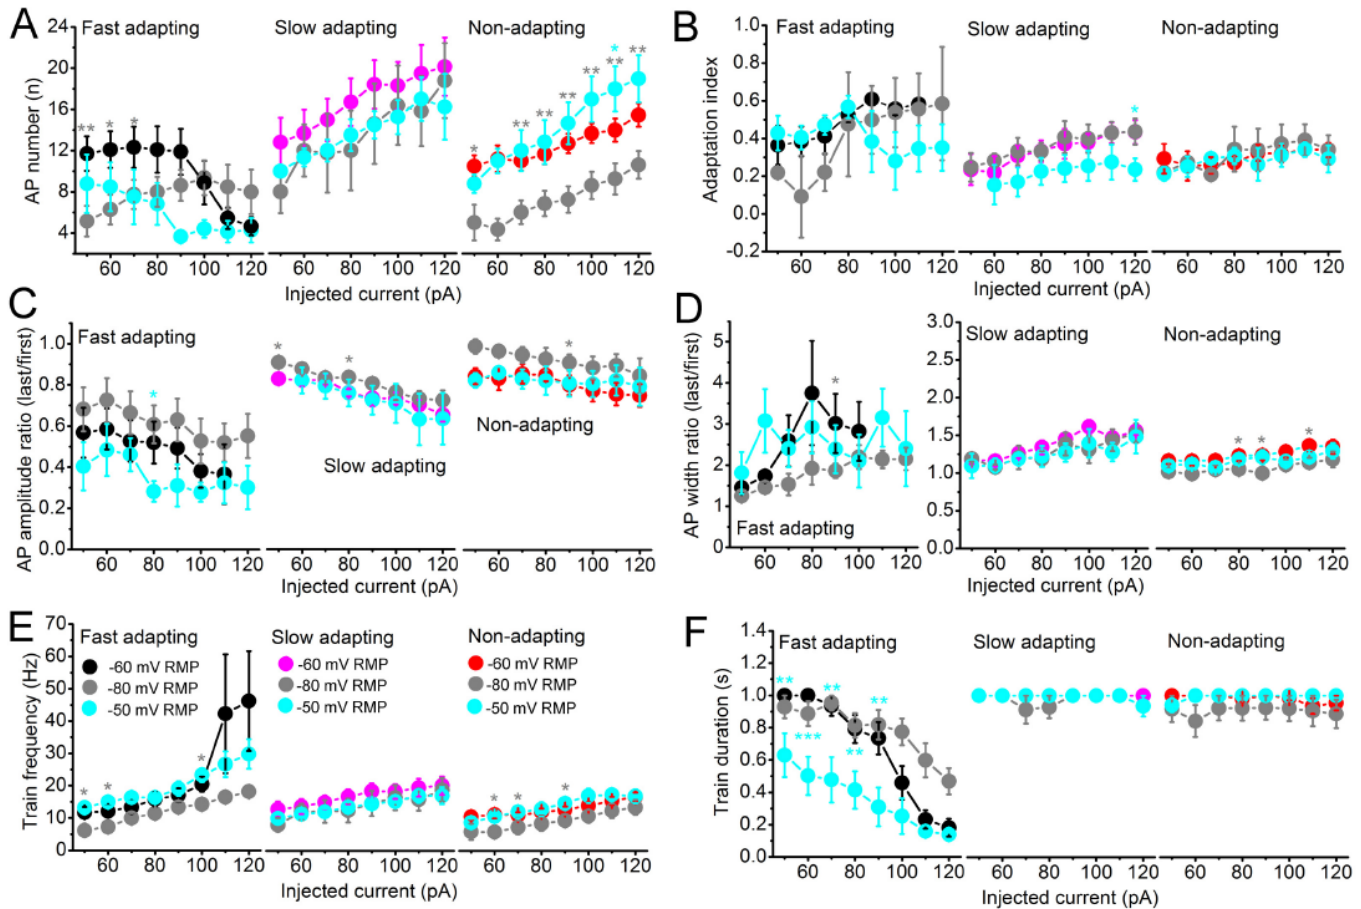

**Supplementary Figure 5. Changes in electrophysiological parameters with different resting membrane potentials. Related to Figure 4.**

**A**, Changes of average action potential firing frequency (AP number) elicited by square current injections. Black trace: fast adapting neuron with resting membrane potential set to -60 mV. Gray trace: neurons from the same group with resting membrane potential set to -80 mV. Blue trace: neurons from the same group with resting membrane potential set to -80 mV (see at panel **E**). Magenta traces: slow adapting neuron with resting membrane potential set to -60 mV. Red traces: non-adapting neuron with resting membrane potential set to -60 mV. Gray asterisks: significant difference between datasets recorded from -60 and -80 mV, blue asterisks: significant difference between datasets recorded from -50 and -60 mV. \*  $p < 0.05$ ; \*\*  $p < 0.01$ ; \*\*\*  $p < 0.001$ . **B**, Changes of the adaptation index with the same color code as on panel **A** and **E**. **C**, Changes of the ratio of the first and last action potential amplitudes (AP amplitude ratio). **D**, Changes of the ratio of the first and last action potential width (AP width ratio). **E**, Changes of the action potential train frequency (i.e. parts of the voltage traces without action potentials are not included in calculation of the frequency). **F**, Changes of the action potential train duration.



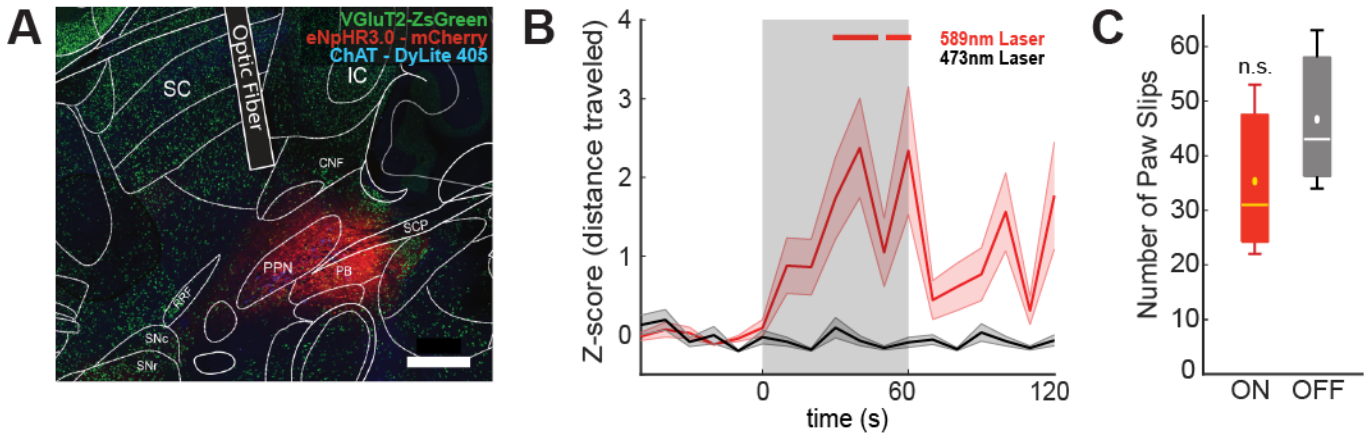

**Supplementary Figure 6. Optogenetic inhibition of PPN glutamatergic neurons. Related to Figure 5.**

**A**, Halorhodopsin (AAV5-Ef1a-DIO-eNpHR3.0-mCherry) was transduced into the PPN of VGlut2-Cre mice crossed with an Ai6 Reporter ( $n=3$ ) and an optic fiber was chronically implanted approximately  $200\mu\text{m}$  above the injection site. **B**, Normalized distance traveled (10s bin) during 1-min inhibition of PPN VGlut2+ neurons.  $t = 0$  defined as onset of laser, shaded area represents time laser is on, control laser (473 nm) represented by black trace (two-way ANOVA, laser type  $\times$  laserON: laser type effect  $F_{(1, 608)}=2.4$ ,  $P=0.1217$ , stimulation effect  $F_{(1,608)}=0.15$ ,  $P=0.7034$ , interaction effect  $F_{(1,608)}=2.1$ ,  $P=0.1474$ ). The line above represents statistically significant difference (mean Z-score  $> 1.96$ ) of distance traveled relative to baseline (1 minute, 10s bins). **C**, The total number of foot slips during laser ON (red boxplot) compared to laser OFF (grey boxplot) on the elevated grid  $t(2)=-2.1634$ ,  $P=0.1630$ . Scale bar:  $500\mu\text{m}$ .

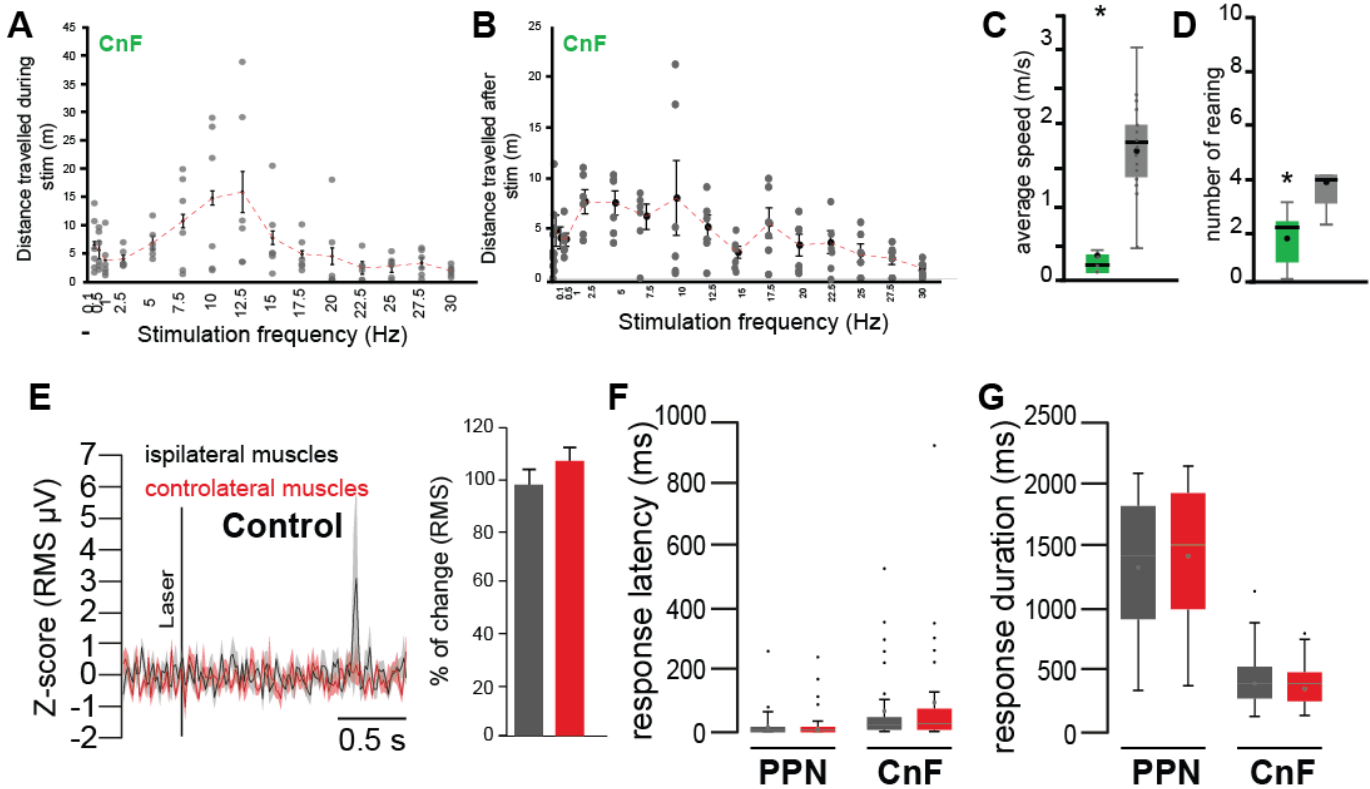

**Supplementary Figure 7. Frequency-dependent modulation of locomotion in the CnF and complementary EMG experiments. Related to Figures 5, 6 and 7.**

**A-B**, Distance traveled following optogenetic stimulation (1s ON/9s OFF) during and immediately after optogenetic stimulation of CnF glutamatergic neurons using a randomized stimulation protocol ranging from 0.1Hz to 30 Hz (mixed ANOVA; *during*:  $F(14,89)=2.69$ ,  $P=0.003$ , trendline:  $R^2 = 0.4774$ , Max: 12.5, Posthoc Bonferroni  $P=0.034$ ; *after*:  $F(14,89)=1.24$ ,  $P=0.2994$ ). Gray dots represent individual data points, black dots represents average values, vertical lines represent SEM, and the red line represents the best fitted trendline ( $y=-0.0314x^2+0.7389x+4.9582$ ). **C**, Average speed of mice in the PPN (green) and control groups (gray) during the elevated grid walk test (t-test two tail:  $t(28)=6.39$ ,  $P=0.00001$ ). **D**, Total number of rearing events observed in the elevated grid walk test following stimulation of PPN glutamatergic neurons (green) and compared to control mice (gray;  $t(15)=2.63$ ,  $P=0.0095$ ). **E**, Z-score and % change in the RMS signal in the ipsilateral and contralateral biceps activity following stimulation of control animals (sham; CTRL<sub>ipsi</sub>:  $97.45\pm 6.09\%$ , CTRL<sub>contra</sub>:  $92.33\pm 6.17$ , two-Way ANOVA stim x side:  $F_{stim}(1,401)=0.18$ ,  $P=0.67$ ,  $F_{side}(1,401)=3.12$ ,  $P=0.078$ ,  $F_{interaction}(3,401)=18.30$ ,  $P=0.093$ ). **F-G**, Response latency (two-way ANOVA target x side:  $F_{target}(1,206)=14.24$ ,  $P=0.0002$ ,  $F_{side}(1,206)=0.14$ ,  $P=0.71$ ,  $F_{interaction}(1,206)=0.05$ ,  $P=0.82$ ) and response duration (two-way ANOVA target x side:  $F_{target}(1,212)=371.60$ ,  $P=0.00001$ ,  $F_{side}(1,212)=0.52$ ,  $P=0.47$ ,  $F_{interaction}(1,212)=1.39$ ,  $P=0.23$ ) of the change in muscle activity following stimulation of PPN or CnF glutamatergic neurons (ipsilateral vs contralateral biceps).



| Abbreviation | Structure                               |
|--------------|-----------------------------------------|
| Amy          | Amygdala                                |
| Aud          | auditory cortex                         |
| BNST         | Bed nucleus stria terminalis            |
| CM           | Centromedial thalamic n.                |
| DR           | Dorsal raphe                            |
| End          | Endopeduncular nucleus                  |
| Gen          | Geniculate nucleus                      |
| Gi           | Gigantocellular nucleus                 |
| GP           | Globus pallidus                         |
| Hab          | Habenula                                |
| Hypoth       | Hypothalamic nucleus                    |
| iCi          | Inferior colliculus                     |
| Lat          | Lateral                                 |
| LDT          | Laterodorsal tegmental nucleus          |
| Lemn         | Lemniscus nucleus                       |
| LPGi         | Lateroposterior gigantocellular nucleus |
| M1           | Primary motor cortex                    |
| MiTg         | Microcellular tegmental nucleus         |
| Mot          | Motor cortex                            |
| n.           | Nucleus                                 |
| Oliv         | Olivary nucleus                         |
| PAG          | Periaqueductal gray nucleus             |
| Parvi        | Parvicellular nucleus                   |
| PCOM         | Nucleus of the posterior commissure     |
| Pf           | Parafascicular thalamic nucleus         |

|        |                                    |
|--------|------------------------------------|
| PMnR   | Pontine mesencephalic nucleus      |
| PNc    | Pontine <i>caudalis</i>            |
| Pno    | Pontine <i>oralis</i>              |
| Post.  | posterior                          |
| preCnF | Precuneiform nucleus               |
| RRF    | Retrorubral field                  |
| Rt     | Reticular nucleus                  |
| SC     | Spinal cord                        |
| sCi    | Superior colliculus                |
| SNc    | Substantia nigra <i>compacta</i>   |
| SNI    | Substantia nigra <i>lateralis</i>  |
| SNr    | Substantia nigra <i>reticulata</i> |
| Som    | Somatosensory cortex               |
| SP5    | Spinal trigeminal nucleus          |
| STN    | Subthalamic nucleus                |
| STR    | Striatum                           |
| Vest   | Vestibular nucleus                 |
| VP     | Ventral pallidum                   |
| VTA    | Ventral tegmental area             |
| ZI     | Zona incerta                       |

**Table S1. Abbreviations. Related to Figures 1-7.**

| <b>Morphological parameters</b>                                  |                                                            |                                                            |              |
|------------------------------------------------------------------|------------------------------------------------------------|------------------------------------------------------------|--------------|
| <b>Parameter</b>                                                 | <b>PPN</b>                                                 | <b>CnF</b>                                                 | <b>p</b>     |
| Dendrite number                                                  | 3.66 ± 0.33                                                | 5.11 ± 0.42                                                | <b>0.007</b> |
| Node number                                                      | 8.08 ± 1.51                                                | 15 ± 4.38                                                  | <b>0.05</b>  |
| Ending number                                                    | 11.58 ± 1.73                                               | 20 ± 4.56                                                  | <b>0.03</b>  |
| Spine number                                                     | 28.83 ± 8.7                                                | 32.11 ± 15.08                                              | <b>0.42</b>  |
| ChAT positivity (%)                                              | 3.4 ± 1.8 %                                                | 0 %                                                        |              |
| n                                                                | 77                                                         | 41                                                         |              |
| <b>Functional parameters</b>                                     |                                                            |                                                            |              |
| <b>Parameter</b>                                                 | <b>PPN</b>                                                 | <b>CnF</b>                                                 | <b>p</b>     |
| A-current amplitude (pA)                                         | 395.13 ± 0.33                                              | 352.49 ± 52.15                                             | 0.32         |
| M-current amplitude (pA; at -40 mV)                              | 6.38 ± 1.76                                                | 11.5 ± 2.41                                                | 0.04         |
| Persistent Na-current amplitude (pA)                             | 26.61 ± 5.41                                               | 5.31 ± 3.11                                                | 0.005        |
| Action potential delay at -60 mV resting membrane potential (ms) | 31.27 ± 4.07                                               | 27.23 ± 7.95                                               | 0.311        |
| Action potential delay at -80 mV resting membrane potential (ms) | 61.39 ± 8.9<br>(p=0.0009 between delays at -60 and -80 mV) | 44.67 ± 10.64<br>(p=0.09 between delays at -60 and -80 mV) | 0.169        |
| Low threshold depolarization amplitude (mV)                      | 17.65 ± 3.09                                               | 12.07 ± 2.17                                               |              |
| Rebound depolarization amplitude (mV)                            | 15.17 ± 2.99                                               | 13.09 ± 1.79                                               |              |
| Input resistance (MΩ)                                            | 818.93 ± 41.94                                             | 792.54 ± 77.9                                              | 0.21         |

**Table S2. Morphological and functional parameters of PPN and CnF glutamatergic neurons. Related to Figure 4.**

| <b>PPN (n = 44)</b>               | <b>%</b> | <b>CnF (n = 24)</b>               | <b>%</b> |
|-----------------------------------|----------|-----------------------------------|----------|
| type I (LTS)                      | 22.7     | type I (LTS)                      | 33.3     |
| type II (first AP delay)          | 47.7     | type II (first AP delay)          | 37.5     |
| type III (LTS and first AP delay) | 9.1      | type III (LTS and first AP delay) | 16.6     |
| type IIIK (none of above)         | 20.5     | type IIIK (none of above)         | 12.5     |

**Table S3. Percentages of functional subtypes of PPN and CnF glutamatergic neurons. Related to Figure 4.**
